# Supplementary material for: Synthesis and Characterization of Antimicrobial Hydrophobic Polyurethane
Source: MDPI journal article supplement (doi:10.3390/ma16124446), 2023-06-17
Supplement: s1 [file s1]

## **Supplemental Information**

### **Synthesis and characterization of antimicrobial hydrophobic polyurethane for reduction of cross-contamination**

Autumn M. RUDLONG<sup>1</sup>, Julie M. GODDARD<sup>1\*</sup>

<sup>1</sup>Department of Food Science, Cornell University, Ithaca, NY, 14853

\*Corresponding author

Telephone: 607-255-8622

Email address [goddard@cornell.edu](mailto:goddard@cornell.edu) (J.M. Goddard), [amr452@cornell.edu](mailto:amr452@cornell.edu) (A.M. Rudlong)

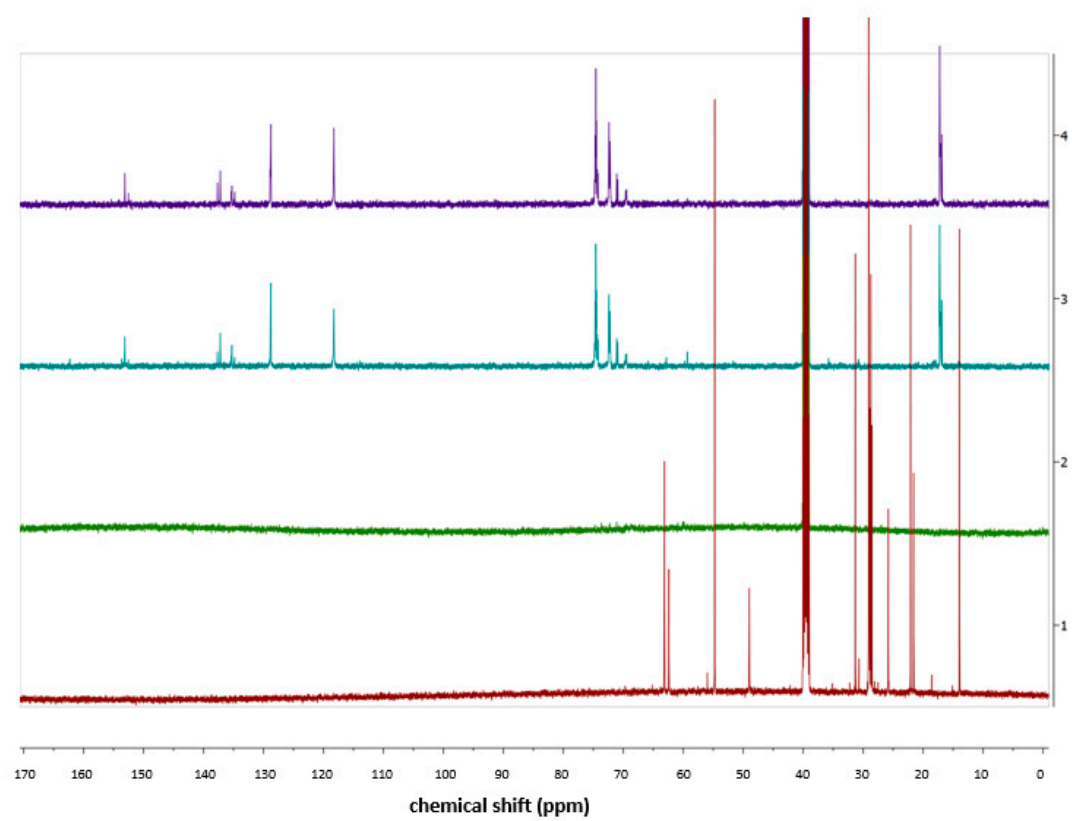

Figure S1.  $^{13}\text{C}$  NMR spectra. C16QAB (1), PFPE (2), C16QAB + PFPE PU (3), polyurethane (4).

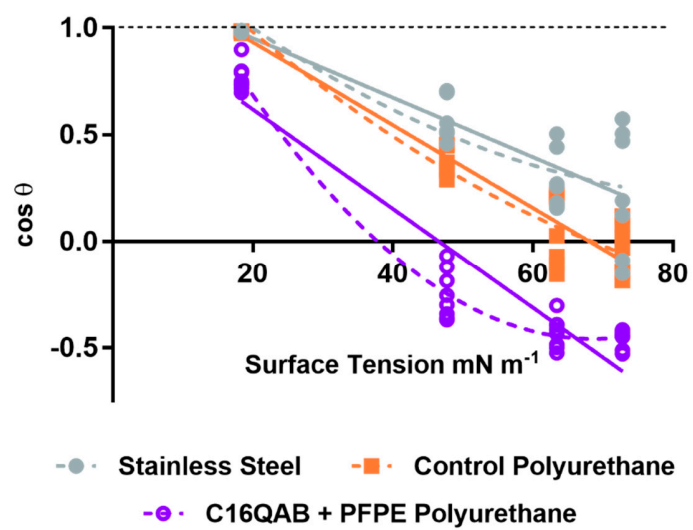

Figure S2. Zisman plot of advancing contact angles for four liquids. Second-order polynomial (quadratic) line fitting (dotted). Linear fit (solid).
